# Supplementary material for: A novel monolithic three-dimensional graphene-based composite with enhanced electrochemical performance
Source: Royal Society of Chemistry journal article supplement (doi:10.1039/c5ta03535j), 2015-01-01
Supplement: c5ta03535j1.pdf [file c5ta03535j1.pdf]

## Supporting Information

### **A novel monolithic three-dimensional graphene-based composite with enhanced electrochemical performance**

*Hai-Tao Xu, Ling Fang, Yanping Mu, Hua-Jun Qiu\*, Yu Wang\**

*The State Key Laboratory of Mechanical Transmissions and School of Chemistry and  
Chemical Engineering, Chongqing University, Chongqing 400044, China*

\*Email: wangy@cqu.edu.cn;

hjqu@cqu.edu.cn;

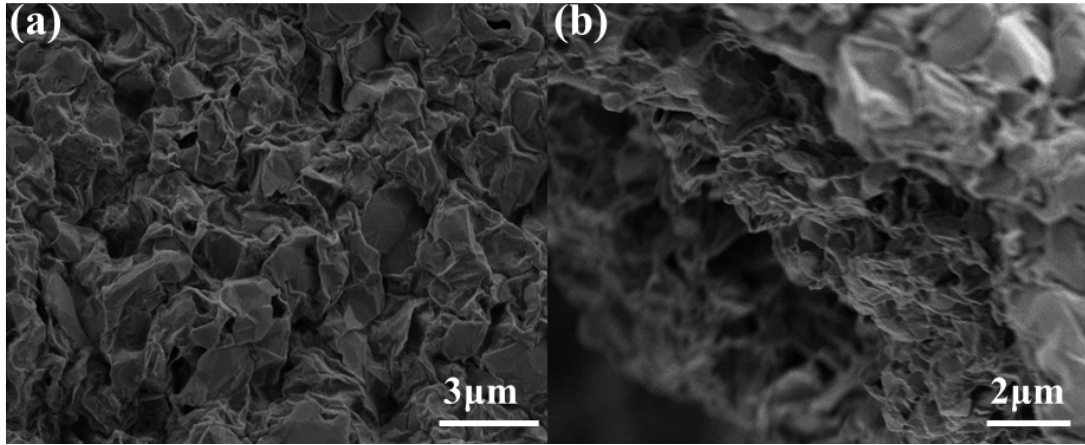

Figure S1. SEM images of the porous graphene (a) and the cross-section of the graphene (b).

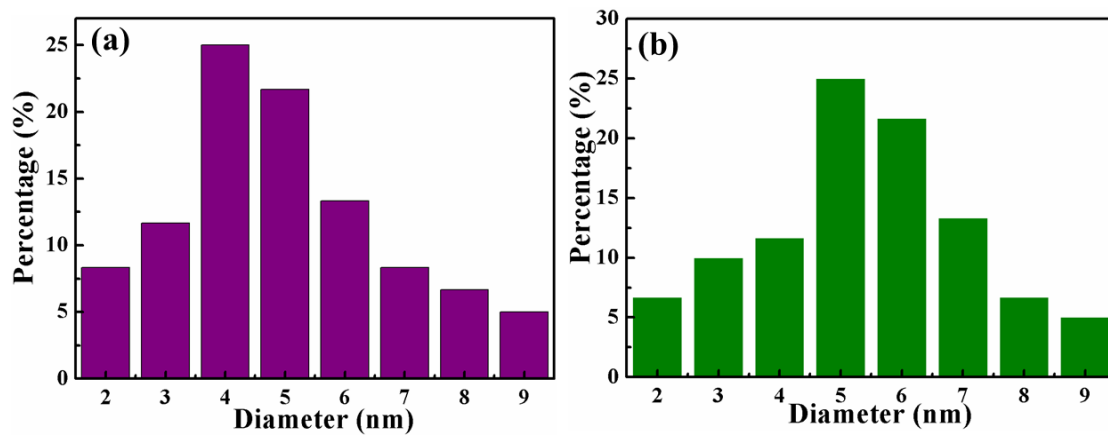

Figure S2. Diameter distribution of the CoO/porous graphene nanocomposite (a) and PdCo/porous graphene(b). One hundred CoO and PdCo particles were separately collected for statistics.

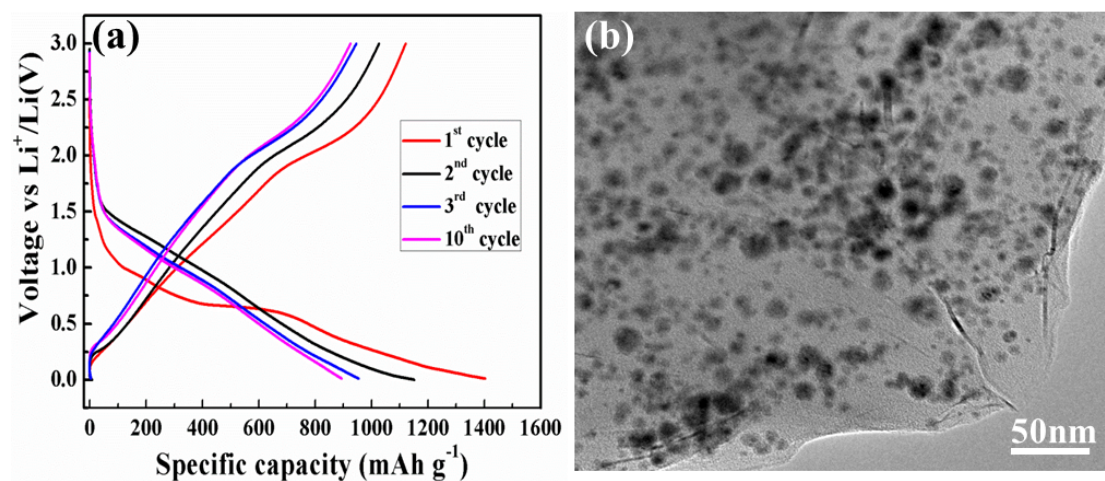

Figure S3. Characterizations of CoO/graphene fabricated at 220°C (a) galvanostatic measurement within the voltage window of 0.01–3.0 V at a rate of  $0.1 \text{ A g}^{-1}$ . (b) TEM image.
